# Supplementary material for: Oligo- and Polymetastatic Progression in Lung Metastasis(es) Patients Is Associated with Specific MicroRNAs
Source: PLOS journal article supplement (doi:10.1371/journal.pone.0050141), 2012-12-10
Supplement: S4 (10.1371/journal.pone.0050141.s004) [file journal.pone.0050141.s004.pdf › journal.pone.0050141.s004.pdf]

**Supplementary Table S1. Description of clinical features of lung metastasis patients.** For each patient in this study, the following clinical information is provided and organized by metastatic rate phenotype: Patient ID; Gender; Age (years) at lung surgery; Primary type; Primary histology; Number metastases at time of surgery; Progression of metastases within a body cavity; Total number of recurrent metastases (following surgery); Time from surgery to first metastatic recurrence (months); Rate of recurrent metastasis (per month); Alive status (Yes/No); Survival (months); Metastatic rate phenotype: HRP, LRP, IRP; Oligo- vs. poly- metastatic progression: OM, PM.

| Patient ID | Gender | Age (years) at lung surgery | Primary type  | Primary histology        | Number metastases at time of surgery | Progression of metastases within a body cavity | Total number of recurrent metastases | Time from surgery to first metastatic recurrence (months) | Rate of recurrent metastasis (per month) | Alive | Survival (months) | Metastatic rate phenotype | Oligo- vs. poly-metastatic phenotype |
|------------|--------|-----------------------------|---------------|--------------------------|--------------------------------------|------------------------------------------------|--------------------------------------|-----------------------------------------------------------|------------------------------------------|-------|-------------------|---------------------------|--------------------------------------|
| 6          | F      | 53                          | Breast        | Adenocarcinoma           | 2                                    | No                                             | 0                                    | N/A                                                       | 0.00                                     | Yes   | 48                | LRP                       | OM                                   |
| 8          | M      | 57                          | Colon         | Adenocarcinoma           | 2                                    | No                                             | 2                                    | 53                                                        | 0.03                                     | Yes   | 59                | LRP                       | OM                                   |
| 14         | F      | 56                          | Extremity     | Soft tissue sarcoma      | 2                                    | No                                             | 1                                    | 67                                                        | 0.01                                     | Yes   | 68                | LRP                       | OM                                   |
| 18         | F      | 60                          | Breast        | Adenocarcinoma           | 1                                    | No                                             | 1                                    | 74                                                        | 0.01                                     | Yes   | 88                | LRP                       | OM                                   |
| 20         | F      | 62                          | Breast        | Adenocarcinoma           | 1                                    | No                                             | 0                                    | N/A                                                       | 0.00                                     | No    | 139               | LRP                       | OM                                   |
| 21         | F      | 64                          | Uterus        | Uterine sarcoma          | 1                                    | No                                             | 0                                    | N/A                                                       | 0.00                                     | Yes   | 51                | LRP                       | OM                                   |
| 23         | F      | 79                          | Colon         | Adenocarcinoma           | 1                                    | No                                             | 0                                    | N/A                                                       | 0.00                                     | Yes   | 39                | LRP                       | OM                                   |
| 24         | F      | 46                          | Breast        | Adenocarcinoma           | 2                                    | No                                             | 0                                    | N/A                                                       | 0.00                                     | Yes   | 149               | LRP                       | OM                                   |
| 31         | M      | 57                          | Colon         | Adenocarcinoma           | 1                                    | No                                             | 0                                    | N/A                                                       | 0.00                                     | Yes   | 71                | LRP                       | OM                                   |
| 32         | F      | 74                          | Extremity     | Soft tissue sarcoma      | 1                                    | No                                             | 0                                    | N/A                                                       | 0.00                                     | Yes   | 27                | LRP                       | OM                                   |
| 36         | M      | 63                          | Bladder       | Adenocarcinoma           | 2                                    | No                                             | 0                                    | N/A                                                       | 0.00                                     | Yes   | 47                | LRP                       | OM                                   |
| 39         | F      | 45                          | Colon         | Adenocarcinoma           | 2                                    | No                                             | 0                                    | N/A                                                       | 0.00                                     | Yes   | 127               | LRP                       | OM                                   |
| 40         | M      | 47                          | Colon         | Adenocarcinoma           | 1                                    | No                                             | 0                                    | N/A                                                       | 0.00                                     | Yes   | 147               | LRP                       | OM                                   |
| 43         | M      | 36                          | Liver         | Hepatocellular carcinoma | 1                                    | No                                             | 0                                    | N/A                                                       | 0.00                                     | Yes   | 19                | LRP                       | OM                                   |
| 45         | F      | 67                          | Thyroid       | Adenocarcinoma           | 2                                    | No                                             | 3                                    | 60                                                        | 0.02                                     | No    | 125               | LRP                       | OM                                   |
| 47         | M      | 32                          | Colon         | Adenocarcinoma           | 1                                    | No                                             | 0                                    | N/A                                                       | 0.00                                     | No    | 81                | LRP                       | OM                                   |
| 48         | F      | 58                          | Extremity     | Soft tissue sarcoma      | 1                                    | No                                             | 0                                    | N/A                                                       | 0.00                                     | Yes   | 84                | LRP                       | OM                                   |
| 49         | F      | 69                          | Renal         | Renal cell carcinoma     | 1                                    | No                                             | 0                                    | N/A                                                       | 0.00                                     | Yes   | 122               | LRP                       | OM                                   |
| 52         | F      | 55                          | Uterus        | Soft tissue sarcoma      | 1                                    | No                                             | 2                                    | 6                                                         | 0.04                                     | No    | 48                | LRP                       | OM                                   |
| 54         | M      | 26                          | Mesentary     | Soft tissue sarcoma      | 2                                    | No                                             | 2                                    | 14                                                        | 0.04                                     | No    | 51                | LRP                       | OM                                   |
| 57         | F      | 58                          | Sacrum        | Soft tissue sarcoma      | 1                                    | No                                             | 0                                    | N/A                                                       | 0.00                                     | Yes   | 94                | LRP                       | OM                                   |
| 59         | F      | 78                          | Cervix        | Adenoid cystic carcinoma | 1                                    | No                                             | 0                                    | N/A                                                       | 0.00                                     | Yes   | 30                | LRP                       | OM                                   |
| 61         | M      | 82                          | Prostate      | Adenocarcinoma           | 2                                    | No                                             | 0                                    | N/A                                                       | 0.00                                     | Yes   | 41                | LRP                       | OM                                   |
| 62         | F      | 31                          | Extremity     | Soft tissue sarcoma      | 1                                    | No                                             | 0                                    | N/A                                                       | 0.00                                     | Yes   | 18                | LRP                       | OM                                   |
| 64         | F      | 55                          | Colon         | Adenocarcinoma           | 2                                    | No                                             | 0                                    | N/A                                                       | 0.00                                     | Yes   | 29                | LRP                       | OM                                   |
| 68         | F      | 81                          | Head and neck | Adenoid cystic carcinoma | 1                                    | No                                             | 1                                    | 12                                                        | 0.05                                     | Yes   | 21                | LRP                       | OM                                   |
| 71         | F      | 66                          | Extremity     | Soft tissue sarcoma      | 3                                    | No                                             | 1                                    | 8                                                         | 0.03                                     | Yes   | 38                | LRP                       | OM                                   |
| 75         | F      | 60                          | Extremity     | Soft tissue sarcoma      | 1                                    | No                                             | 1                                    | 74                                                        | 0.01                                     | No    | 120               | LRP                       | OM                                   |
| 76         | F      | 62                          | Head and neck | Squamous cell carcinoma  | 1                                    | No                                             | 0                                    | N/A                                                       | 0.00                                     | No    | 20                | LRP                       | OM                                   |
| 77         | M      | 56                          | Colon         | Adenocarcinoma           | 1                                    | No                                             | 0                                    | N/A                                                       | 0.00                                     | Yes   | 81                | LRP                       | OM                                   |
| 83         | M      | 51                          | Extremity     | Soft tissue sarcoma      | 3                                    | No                                             | 2                                    | 42                                                        | 0.02                                     | Yes   | 121               | LRP                       | OM                                   |
| 87         | M      | 62                          | Thyroid       | Adenocarcinoma           | 1                                    | No                                             | 3                                    | 22                                                        | 0.04                                     | Yes   | 69                | LRP                       | OM                                   |

|    |   |    |                |                             |   |     |    |    |      |     |    |     |    |
|----|---|----|----------------|-----------------------------|---|-----|----|----|------|-----|----|-----|----|
| 2  | F | 52 | Colon          | Adenocarcinoma              | 2 | No  | 10 | 4  | 0.37 | No  | 27 | HRP | PM |
| 3  | F | 58 | Colon          | Adenocarcinoma              | 2 | Yes | 7  | 3  | 0.70 | No  | 10 | HRP | PM |
| 5  | F | 67 | Extremity      | Osteosarcoma                | 1 | No  | 10 | 8  | 0.83 | No  | 12 | HRP | PM |
| 7  | F | 41 | Anus           | Squamous cell carcinoma     | 5 | Yes | 10 | 7  | 0.59 | Yes | 17 | HRP | PM |
| 25 | F | 62 | Renal          | Renal cell carcinoma        | 5 | No  | 10 | 6  | 0.59 | No  | 17 | HRP | PM |
| 26 | M | 56 | Bladder        | Transitional cell carcinoma | 1 | No  | 10 | 5  | 0.42 | Yes | 24 | HRP | PM |
| 28 | M | 56 | Renal          | Renal cell carcinoma        | 2 | No  | 10 | 8  | 0.59 | No  | 17 | HRP | PM |
| 29 | F | 54 | Salivary gland | Adenoid cystic carcinoma    | 1 | Yes | 10 | 3  | 2.00 | No  | 5  | HRP | PM |
| 34 | M | 61 | Extremity      | Soft tissue sarcoma         | 1 | No  | 10 | 9  | 0.37 | No  | 27 | HRP | PM |
| 46 | M | 62 | Renal          | Renal cell carcinoma        | 1 | No  | 10 | 6  | 0.37 | No  | 27 | HRP | PM |
| 60 | F | 65 | Chest wall     | Soft tissue sarcoma         | 1 | No  | 10 | 7  | 0.53 | No  | 19 | HRP | PM |
| 69 | M | 48 | Colon          | Adenocarcinoma              | 2 | No  | 10 | 2  | 0.33 | No  | 30 | HRP | PM |
| 73 | M | 52 | Head and neck  | Squamous cell carcinoma     | 3 | No  | 10 | 9  | 0.50 | No  | 20 | HRP | PM |
| 78 | M | 66 | Bile duct      | Cholangiocarcinoma          | 2 | Yes | 10 | 11 | 0.50 | Yes | 20 | HRP | PM |
| 82 | M | 83 | Head and neck  | Angiosarcoma                | 2 | Yes | 10 | 3  | 0.77 | No  | 13 | HRP | PM |
| 90 | M | 68 | Esophagus      | Adenosquamous               | 1 | No  | 7  | 2  | 1.40 | No  | 5  | HRP | PM |
| 13 | F | 38 | Extremity      | Soft tissue sarcoma         | 1 | No  | 3  | 10 | 0.09 | Yes | 32 | IRP | OM |
| 16 | M | 24 | Extremity      | Osteosarcoma                | 1 | No  | 8  | 16 | 0.13 | No  | 61 | IRP | OM |
| 17 | F | 70 | Colon          | Adenocarcinoma              | 1 | No  | 10 | 13 | 0.16 | No  | 62 | IRP | OM |
| 33 | F | 46 | Renal          | Renal cell carcinoma        | 1 | No  | 9  | 9  | 0.16 | Yes | 55 | IRP | OM |
| 56 | M | 68 | Lung           | Soft tissue sarcoma         | 2 | No  | 5  | 5  | 0.24 | No  | 21 | IRP | OM |
| 63 | M | 45 | Extremity      | Soft tissue sarcoma         | 2 | No  | 10 | 19 | 0.13 | No  | 78 | IRP | OM |
| 81 | M | 72 | Extremity      | Soft tissue sarcoma         | 1 | No  | 10 | 6  | 0.28 | No  | 36 | IRP | OM |
| 1  | M | 68 | Renal          | Renal cell carcinoma        | 1 | No  | 10 | 8  | 0.21 | No  | 47 | IRP | PM |
| 9  | M | 73 | Colon          | Adenocarcinoma              | 1 | No  | 10 | 21 | 0.14 | No  | 70 | IRP | PM |
| 37 | F | 29 | Sacrum         | Soft tissue sarcoma         | 1 | No  | 10 | 20 | 0.14 | No  | 74 | IRP | PM |
| 44 | M | 73 | Colon          | Adenocarcinoma              | 4 | No  | 7  | 10 | 0.13 | No  | 52 | IRP | PM |
| 58 | M | 32 | Shoulder       | Soft tissue sarcoma         | 1 | Yes | 10 | 18 | 0.20 | No  | 50 | IRP | PM |
| 67 | M | 55 | Renal          | Renal cell carcinoma        | 4 | No  | 10 | 6  | 0.26 | No  | 38 | IRP | PM |
| 79 | M | 71 | Head and neck  | Melanoma                    | 1 | No  | 10 | 43 | 0.30 | Yes | 43 | IRP | PM |
| 88 | M | 63 | Renal          | Renal cell carcinoma        | 2 | No  | 10 | 13 | 0.20 | No  | 50 | IRP | PM |

Table S1 page 2 of 2
