# Supplementary material for: Oligo- and Polymetastatic Progression in Lung Metastasis(es) Patients Is Associated with Specific MicroRNAs
Source: PLOS journal article supplement (doi:10.1371/journal.pone.0050141), 2012-12-10
Supplement: S5 (10.1371/journal.pone.0050141.s005) [file journal.pone.0050141.s005.pdf › journal.pone.0050141.s005.pdf]

**Supplementary Tables S2A and S2B. Characteristics of patients with LRP and HRP progression (S2A) and oligometastatic (OM) and polymetastatic (PM) progression (S2B) in lung metastasis samples.**  
Legend: Student's t-test (t-test); two-tailed Fisher's Exact Test (FET); two-tailed non-parametric Mann Whitney Test (MWT); log-rank Mantel-Cox test (Log-rank); \*=statistically significant; *ns* = not significant

| Supplementary Table S2A                                                     |                         |                                     |                              |                              |                                  |
|-----------------------------------------------------------------------------|-------------------------|-------------------------------------|------------------------------|------------------------------|----------------------------------|
| Patients (#)                                                                | Overall Group<br>(N=63) | Cumulative<br>LRP and HRP<br>(N=48) | LRP<br>progression<br>(N=32) | HRP<br>progression<br>(N=16) | p-value                          |
| <b>Median age at surgery (Range)</b>                                        | 58 (24-83)              | 58 (26-83)                          | 58 (26-82)                   | 59 (41-83)                   | 0.67 <i>ns</i> (t-test)          |
| <b>Sex</b>                                                                  |                         |                                     |                              |                              |                                  |
| Female (%)                                                                  | 32                      | 28                                  | 21 (75%)                     | 7 (25%)                      | 0.22 <i>ns</i> (FET)             |
| Male (%)                                                                    | 31                      | 20                                  | 11 (55%)                     | 9 (45%)                      |                                  |
| <b>Primary tumor type</b>                                                   |                         |                                     |                              |                              |                                  |
| Gastrointestinal                                                            | 16                      | 13                                  | 8                            | 5                            | 0.74 <i>ns</i> (FET)             |
| Musculoskeletal/Soft Tissue                                                 | 18                      | 12                                  | 9                            | 3                            | 0.73 <i>ns</i> (FET)             |
| Genitourinary                                                               | 11                      | 7                                   | 3                            | 4                            | 0.20 <i>ns</i> (FET)             |
| Head and Neck                                                               | 8                       | 7                                   | 4                            | 3                            | 0.67 <i>ns</i> (FET)             |
| Breast                                                                      | 4                       | 4                                   | 4                            | 0                            | 0.29 <i>ns</i> (FET)             |
| Gynecologic                                                                 | 3                       | 3                                   | 3                            | 0                            | 0.54 <i>ns</i> (FET)             |
| Hepatobiliary                                                               | 2                       | 2                                   | 1                            | 1                            | 1.0 <i>ns</i> (FET)              |
| Lung                                                                        | 1                       | 0                                   | 0                            | 0                            | 1.0 <i>ns</i> (FET)              |
| <b>Histology</b>                                                            |                         |                                     |                              |                              |                                  |
| Adenocarcinoma                                                              | 23                      | 19                                  | 16                           | 3                            | 0.06 <i>ns</i> (FET)             |
| Sarcoma                                                                     | 22                      | 15                                  | 11                           | 4                            | 0.74 <i>ns</i> (FET)             |
| Renal Cell Carcinoma                                                        | 7                       | 4                                   | 1                            | 3                            | 0.10 <i>ns</i> (FET)             |
| Squamous Cell Carcinoma                                                     | 3                       | 3                                   | 1                            | 2                            | 0.25 <i>ns</i> (FET)             |
| Adenoid Cystic Carcinoma                                                    | 3                       | 3                                   | 2                            | 1                            | 1.0 <i>ns</i> (FET)              |
| Other                                                                       | 5                       | 4                                   | 1                            | 3                            |                                  |
| <b>Median # metastasis(es) at surgery (Range)</b>                           | 1 (1-5)                 | 1 (1-5)                             | 1 (1-3)                      | 2 (1-5)                      | 0.15 <i>ns</i> (MWT)             |
| <b>Median # of total recurrent metastasis(es) following surgery (Range)</b> | 3 (0-10)                | 1 (0-10)                            | 0 (0-3)                      | 10 (7-10)                    | <b>&lt;0.0001*</b><br>(MWT)      |
| <b>Survival (total # alive throughout follow-up/total per group)</b>        | 31/63                   | 28/48                               | 25/32                        | 3/16                         | <b>0.0001*</b><br>(FET)          |
| <b>Median follow-up time (months) (Range)</b>                               | 47 (5-149)              | 38.5 (5-149)                        | 63.5 (18-149)                | 18 (5-24)                    | <b>&lt;0.0001*</b><br>(Log-rank) |

| Supplementary Table S2B                                                     |            |                             |                             |                                  |
|-----------------------------------------------------------------------------|------------|-----------------------------|-----------------------------|----------------------------------|
| Patients (#)                                                                | All (N=63) | OM<br>progression<br>(N=39) | PM<br>progression<br>(N=24) | p-value                          |
| <b>Median age at surgery (Range)</b>                                        | 58 (24-83) | 58 (24-82)                  | 61 (29-83)                  | 0.54 <i>ns</i> (t-test)          |
| <b>Sex</b>                                                                  |            |                             |                             |                                  |
| Female (%)                                                                  | 32         | 24 (62%)                    | 8 (33%)                     | 0.04* (FET)                      |
| Male (%)                                                                    | 31         | 15 (38%)                    | 16 (67%)                    |                                  |
| <b>Primary tumor type</b>                                                   |            |                             |                             |                                  |
| Gastrointestinal                                                            | 16         | 9                           | 7                           | 0.77 <i>ns</i> (FET)             |
| Musculoskeletal/Soft Tissue                                                 | 18         | 13                          | 5                           | 0.39 <i>ns</i> (FET)             |
| Genitourinary                                                               | 11         | 4                           | 7                           | 0.09 <i>ns</i> (FET)             |
| Head and Neck                                                               | 8          | 4                           | 4                           | 0.47 <i>ns</i> (FET)             |
| Breast                                                                      | 4          | 4                           | 0                           | 0.29 <i>ns</i> (FET)             |
| Gynecologic                                                                 | 3          | 3                           | 0                           | 0.28 <i>ns</i> (FET)             |
| Hepatobiliary                                                               | 2          | 1                           | 1                           | 1.0 <i>ns</i> (FET)              |
| Lung                                                                        | 1          | 1                           | 0                           | 1.0 <i>ns</i> (FET)              |
| <b>Histology</b>                                                            |            |                             |                             |                                  |
| Adenocarcinoma                                                              | 22         | 17                          | 5                           | 0.10 <i>ns</i> (FET)             |
| Sarcoma                                                                     | 22         | 16                          | 6                           | 0.28 <i>ns</i> (FET)             |
| Renal Cell Carcinoma                                                        | 8          | 2                           | 6                           | 0.05* (FET)                      |
| Squamous Cell Carcinoma                                                     | 3          | 1                           | 2                           | 0.55 <i>ns</i> (FET)             |
| Adenoid Cystic Carcinoma                                                    | 3          | 2                           | 1                           | 1.0 <i>ns</i> (FET)              |
| Other                                                                       | 5          | 1                           | 4                           |                                  |
| <b>Median # metastasis(es) at surgery (Range)</b>                           | 1 (1-5)    | 1 (1-3)                     | 1.5 (1-5)                   | 0.14 <i>ns</i> (MWT)             |
| <b>Median # of total recurrent metastasis(es) following surgery (Range)</b> | 3 (0-10)   | 0 (0-10)                    | 10 (7-10)                   | <b>&lt;0.0001*</b><br>(MWT)      |
| <b>Survival (total # alive throughout follow-up/total per group)</b>        | 31/63      | 27/39                       | 4/24                        | <b>7.02E-5*</b> (FET)            |
| <b>Median follow-up time (months) (Range)</b>                               | 47 (5-149) | 59 (18-149)                 | 25.5 (5-74)                 | <b>&lt;0.0001*</b><br>(Log-rank) |
