# Supplementary material for: Oligo- and Polymetastatic Progression in Lung Metastasis(es) Patients Is Associated with Specific MicroRNAs
Source: PLOS journal article supplement (doi:10.1371/journal.pone.0050141), 2012-12-10
Supplement: S6 (10.1371/journal.pone.0050141.s006) [file journal.pone.0050141.s006.pdf › journal.pone.0050141.s006.pdf]

**Supplementary Table S3. Classification of primary and metastatic patient samples of the independent validation dataset into stratified metastatic phenotypes.** For each patient in the independent validation study [GEO: GSE25552], the following clinical information is provided and organized by metastatic rate phenotype: Patient ID; Primary vs. metastasis tumor type; Time to first metastatic recurrence following radiotherapy (months); Rate of recurrent metastasis(es) per month following radiotherapy throughout follow-up, Alive status (Yes/No); Survival (months); Metastatic rate phenotype: HRP, LRP, IRP; Oligo- vs. poly-metastatic progression: OM, PM. Note for this study that all HRP patients must also be classified as PM and all LRP patients must be classified as OM. The \* in the Survival (months) column represents updated follow-up since the original publication [Lussier et al 2011].

| Patient ID | Primary vs. metastasis tumor type | Time to first metastatic recurrence following radiotherapy (months) | Rate of recurrent metastasis(es) per month following radiotherapy | Alive | Survival (months) | Metastatic rate phenotype | Oligo- vs.poly-metastatic progression |
|------------|-----------------------------------|---------------------------------------------------------------------|-------------------------------------------------------------------|-------|-------------------|---------------------------|---------------------------------------|
| 1a         | Primary                           | 4.0                                                                 | 1.00                                                              | No    | 10.5              | HRP                       | PM                                    |
| 204b       | Metastasis                        | 17.0                                                                | 0.55                                                              | No    | 18.2              | HRP                       | PM                                    |
| 230a       | Primary                           | 1.0                                                                 | 0.91                                                              | No    | 11.1              | HRP                       | PM                                    |
| 236b       | Metastasis                        | 17.0                                                                | 0.38                                                              | Yes   | *23.5             | HRP                       | PM                                    |
| 2a         | Primary                           | 23.0                                                                | 0.36                                                              | No    | 27.4              | HRP                       | PM                                    |
| 39a        | Primary                           | 1.0                                                                 | 0.83                                                              | No    | 11.9              | HRP                       | PM                                    |
| 46a        | Primary                           | 1.0                                                                 | 1.25                                                              | No    | 8.4               | HRP                       | PM                                    |
| 4a         | Primary                           | 6.0                                                                 | 0.34                                                              | No    | 29.5              | HRP                       | PM                                    |
| 4b         | Metastasis                        | 6.0                                                                 | 0.34                                                              | No    | 29.5              | HRP                       | PM                                    |
| 59b        | Metastasis                        | 1.0                                                                 | 0.56                                                              | No    | 17.9              | HRP                       | PM                                    |
| 6a         | Primary                           | 4.0                                                                 | 0.83                                                              | No    | 11.5              | HRP                       | PM                                    |
| 6b1        | Metastasis                        | 4.0                                                                 | 0.87                                                              | No    | 11.5              | HRP                       | PM                                    |
| 6b2        | Metastasis                        | 4.0                                                                 | 0.87                                                              | No    | 11.5              | HRP                       | PM                                    |
| 7b         | Metastasis                        | 1.0                                                                 | 0.79                                                              | No    | 12.6              | HRP                       | PM                                    |
| 18a        | Primary                           | 11.0                                                                | 0.00                                                              | No    | 10.2              | LRP                       | OM                                    |
| 18b        | Metastasis                        | 10.2                                                                | 0.00                                                              | No    | 10.2              | LRP                       | OM                                    |
| 217a       | Primary                           | 29.0                                                                | 0.00                                                              | Yes   | 32.9              | LRP                       | OM                                    |
| 221a       | Primary                           | 35.0                                                                | 0.00                                                              | Yes   | 35.8              | LRP                       | OM                                    |
| 228a       | Primary                           | 7.0                                                                 | 0.00                                                              | No    | 14.0              | LRP                       | OM                                    |
| 231a       | Primary                           | 22.0                                                                | 0.00                                                              | Yes   | 22.0              | LRP                       | OM                                    |
| 27a        | Primary                           | 54.0                                                                | 0.00                                                              | Yes   | 59.8              | LRP                       | OM                                    |
| 31b        | Metastasis                        | 31.0                                                                | 0.03                                                              | Yes   | *57.4             | LRP                       | OM                                    |
| 52a        | Primary                           | 39.0                                                                | 0.00                                                              | Yes   | 40.8              | LRP                       | OM                                    |
| 57a        | Primary                           | 26.0                                                                | 0.00                                                              | Yes   | 26.2              | LRP                       | OM                                    |
| 13a        | Primary                           | 1.0                                                                 | 0.33                                                              | No    | 14.9              | IRP                       | OM                                    |
| 15a        | Primary                           | 4.0                                                                 | 0.12                                                              | Yes   | 33.6              | IRP                       | OM                                    |
| 15b        | Metastasis                        | 4.0                                                                 | 0.12                                                              | Yes   | 33.6              | IRP                       | OM                                    |
| 202b       | Metastasis                        | 21.0                                                                | 0.09                                                              | Yes   | *55.4             | IRP                       | OM                                    |
| 209a       | Primary                           | 13.0                                                                | 0.18                                                              | No    | 17.4              | IRP                       | OM                                    |
| 220a       | Primary                           | 2.0                                                                 | 0.11                                                              | Yes   | 34.4              | IRP                       | OM                                    |
| 22a        | Primary                           | 1.0                                                                 | 0.10                                                              | Yes   | 29.2              | IRP                       | OM                                    |
| 22b        | Metastasis                        | 1.0                                                                 | 0.10                                                              | Yes   | 29.2              | IRP                       | OM                                    |
| 23b        | Metastasis                        | 12.0                                                                | 0.20                                                              | Yes   | *50.5             | IRP                       | OM                                    |
| 244a       | Primary                           | 3.0                                                                 | 0.25                                                              | Yes   | 12.7              | IRP                       | OM                                    |
| 26a        | Primary                           | 2.0                                                                 | 0.08                                                              | Yes   | 58.7              | IRP                       | OM                                    |
| 49b1       | Metastasis                        | 12.0                                                                | 0.16                                                              | Yes   | *44.6             | IRP                       | OM                                    |
| 49b2       | Metastasis                        | 12.0                                                                | 0.16                                                              | Yes   | *44.6             | IRP                       | OM                                    |
| 58a        | Primary                           | 1.0                                                                 | 0.29                                                              | Yes   | 34.5              | IRP                       | OM                                    |
| 5b         | Metastasis                        | 1.0                                                                 | 0.11                                                              | No    | 18.2              | IRP                       | OM                                    |
| 60a        | Primary                           | 34.0                                                                | 0.14                                                              | Yes   | 37.5              | IRP                       | OM                                    |
| 65a        | Primary                           | 22.0                                                                | 0.15                                                              | Yes   | 32.6              | IRP                       | OM                                    |
