# Supplementary material for: Oligo- and Polymetastatic Progression in Lung Metastasis(es) Patients Is Associated with Specific MicroRNAs
Source: PLOS journal article supplement (doi:10.1371/journal.pone.0050141), 2012-12-10
Supplement: S7 (10.1371/journal.pone.0050141.s007) [file journal.pone.0050141.s007.pdf › journal.pone.0050141.s007.pdf]

**Supplementary Table S4. Evidence of tumor suppression and tumor promotion functions of prioritized microRNAs between LRP and HRP patients of the lung metastasis dataset.** The tumor suppressing and tumor promoting functions of each of the 40 prioritized microRNAs between LRP and HRP patients of the lung metastasis dataset (Table 1) were investigated. Inclusion criteria used for citations required that each study provide experimental evidence for the role of the microRNA in a cancer context (i.e. cancer cell culture model, animal model of cancer, or human cancer samples) and that functional assays were performed. For instance, differential expression of a microRNA between cancer and control states were not considered as experimental evidence if they were not accompanied with experiments examining the functional role in either suppressing or promoting the cancer phenotype in regards to the expression results. Experiments conducted in human samples were considered if expression results were correlated to meaningful clinical variables (e.g. survival outcome, metastatic progression).

| miRNA       | Evidence of tumor suppression function |                                                              |                        |                                            | Evidence of tumor promotion function |                   |      |              |
|-------------|----------------------------------------|--------------------------------------------------------------|------------------------|--------------------------------------------|--------------------------------------|-------------------|------|--------------|
|             | PMID                                   | Author                                                       | Year                   | Journal                                    | PMID                                 | Author            | Year | Journal      |
| let-7b      | 21087605                               | Fu TY et al                                                  | 2011                   | Exp Cell Res                               | -                                    | -                 | -    | -            |
| let-7c      | 21984339                               | Han HB et al                                                 | 2012                   | J Pathol                                   | -                                    | -                 | -    | -            |
| miR-127-3p  | -                                      | -                                                            | -                      | -                                          | -                                    | -                 | -    | -            |
| miR-127-5p  | -                                      | -                                                            | -                      | -                                          | -                                    | -                 | -    | -            |
| miR-128     | 18810376;<br>19010882;<br>19713529     | Zhang Y et al;<br>Godlweski J et al;<br>Evangelistic C et al | 2009;<br>2008;<br>2009 | J Mol Med (Berl); Cancer Res;<br>FASEB J   | -                                    | -                 | -    | -            |
| miR-133a    | 22266319;<br>22292984                  | Kinoshita T et al;<br>Wu ZS et al                            | 2012;<br>2012          | Biochem Biophys Res Commun;<br>BMC Cancer  | -                                    | -                 | -    | -            |
| miR-135a    | 22439757;<br>21888875                  | Chen Y et al;<br>Liu S et al                                 | 2012;<br>2012          | BMC Cancer;<br>J Hepatol                   | -                                    | -                 | -    | -            |
| miR-153     | 19676043                               | Xu J et al                                                   | 2010                   | Int J Cancer                               | 20028871                             | Myatt SS et al    | 2010 | Cancer Res   |
| miR-154     | 21128228                               | Wang W et al                                                 | 2011                   | Int J Cancer                               | -                                    | -                 | -    | -            |
| miR-191     | -                                      | -                                                            | -                      | -                                          | 21880514                             | Leite KR et al    | 2011 | Urol Oncol   |
| miR-199a-5p | 22438992;<br>20799954                  | Huang L et al;<br>Shen Q et al                               | 2012;<br>2010          | PLoS One;<br>Mol Cancer                    | -                                    | -                 | -    | -            |
| miR-199b-5p | 19308264                               | Garzia L et al                                               | 2009                   | PLoS One                                   | -                                    | -                 | -    | -            |
| miR-205     | 19665999;<br>19238171                  | Song H et al;<br>Wu H et al                                  | 2009;<br>2009          | Biochem Biophys Res Commun;<br>Cell Res    | 20103531                             | Greene SB et al   | 2010 | J Cell Sci   |
| miR-296-3p  | -                                      | -                                                            | -                      | -                                          | -                                    | -                 | -    | -            |
| miR-298     | -                                      | -                                                            | -                      | -                                          | -                                    | -                 | -    | -            |
| miR-299-3p  | -                                      | -                                                            | -                      | -                                          | -                                    | -                 | -    | -            |
| miR-328     | 20211135                               | Eiring AM et al                                              | 2010                   | Cell                                       | 21448905                             | Arora S et al     | 2011 | Int J Cancer |
| miR-329     | -                                      | -                                                            | -                      | -                                          | -                                    | -                 | -    | -            |
| miR-330-5p  | 19597470                               | Lee KH et al                                                 | 2009                   | Oncogene                                   | -                                    | -                 | -    | -            |
| miR-369-3p  | -                                      | -                                                            | -                      | -                                          | -                                    | -                 | -    | -            |
| miR-380     | -                                      | -                                                            | -                      | -                                          | 20871609                             | Swarbrick A et al | 2010 | Nat Med      |
| miR-412     | -                                      | -                                                            | -                      | -                                          | -                                    | -                 | -    | -            |
| miR-448     | -                                      | -                                                            | -                      | -                                          | -                                    | -                 | -    | -            |
| miR-453     | -                                      | -                                                            | -                      | -                                          | -                                    | -                 | -    | -            |
| miR-485-3p  | -                                      | -                                                            | -                      | -                                          | -                                    | -                 | -    | -            |
| miR-485-5p  | 21083603                               | Kim TH et al                                                 | 2010                   | Histopathology                             | -                                    | -                 | -    | -            |
| miR-491-5p  | 21831363                               | Yan W et al                                                  | 2011                   | Brain Res                                  | -                                    | -                 | -    | -            |
| miR-502-5p  | -                                      | -                                                            | -                      | -                                          | -                                    | -                 | -    | -            |
| miR-506     | 21726609                               | Zhao Y et al                                                 | 2011                   | Toxicol Lett                               | -                                    | -                 | -    | -            |
| miR-520a-3p | -                                      | -                                                            | -                      | -                                          | 20190813                             | Wu S et al        | 2010 | Oncogene     |
| miR-520g    | -                                      | -                                                            | -                      | -                                          | -                                    | -                 | -    | -            |
| miR-541     | -                                      | -                                                            | -                      | -                                          | -                                    | -                 | -    | -            |
| miR-544     | 22037351                               | Thayanithy V et al                                           | 2012                   | Bone                                       | -                                    | -                 | -    | -            |
| miR-576-5p  | -                                      | -                                                            | -                      | -                                          | -                                    | -                 | -    | -            |
| miR-582-5p  | -                                      | -                                                            | -                      | -                                          | -                                    | -                 | -    | -            |
| miR-654-5p  | 21343391                               | Ostling P et al                                              | 2011                   | Cancer Res                                 | -                                    | -                 | -    | -            |
| miR-655     | -                                      | -                                                            | -                      | -                                          | -                                    | -                 | -    | -            |
| miR-672     | -                                      | -                                                            | -                      | -                                          | -                                    | -                 | -    | -            |
| miR-887     | -                                      | -                                                            | -                      | -                                          | -                                    | -                 | -    | -            |
| miR-98      | 22492871;<br>20525879                  | Panda H et al;<br>Wang YC et al                              | 2012;<br>2010          | J Clin Endocrinol Metab;<br>Carcinogenesis | -                                    | -                 | -    | -            |
